# Supplementary material for: Association between Inflammatory Bowel Disease and Pancreatitis: A PRISMA-Compliant Systematic Review
Source: Gastroenterol Res Pract. 2020 Aug 3;2020:7305241. doi: 10.1155/2020/7305241 (PMC7422476; doi:10.1155/2020/7305241)
Supplement: Supplementary Materials — Table SM1: search strategy. Table SM2: PRISMA checklist. Table SM3: MOOSE checklist. [file 7305241.f1.doc]

Supplementary Materials

**Table SM1: Search Strategy**

**Table SM2: PRISMA checklist**

**Table SM3: MOOSE checklist**

**Table SM1 Search Strategy**

| Database | Search Strategy of Electronic Database in Sequence | |
| --- | --- | --- |
| MEDLINE | 1. | exp Pancreatitis/ |
| 2. | pancreatitis.mp. |
| 3. | pancreatitides.mp. |
| 4. | 1 or 2 or 3 |
| 5. | exp Inflammatory Bowel Diseases/ |
| 6. | inflammatory bowel disease.mp. |
| 7. | exp Crohn Disease/ |
| 8. | Crohn$ disease.mp. |
| 9. | Crohn$ colitis.mp. |
| 10. | granulomatous colitis.mp. |
| 11. | Crohn$ enteritis.mp. |
| 12. | regional enteritis.mp. |
| 13. | exp Colitis, Ulcerative/ |
| 14. | ulcerative colitis.mp. |
| 15. | idiopathic proctocolitis.mp. |
| 16. | pancolitis.mp. |
| 17. | colitis gravis.mp. |
| 18. | ulcerative proctosigmoiditis.mp. |
| 19. | 5 or 6 or 7 or 8 or 9 or 10 or 11 or 12 or 13 or 14 or 15 or 16 or 17 or 18 |
| 20. | 4 and 19 |
| Embase | 1. | 'pancreatitis'/exp |
| 2. | 'pancreatitis':ti,ab |
| 3. | 'pancreatitides':ti,ab |
| 4. | 1 or 2 or 3 |
| 5. | 'inflammatory bowel disease'/exp |
| 6. | 'inflammatory bowel disease' |
| 7. | 'crohn disease'/exp |
| 8. | 'crohn$ disease' |
| 9. | 'crohn$ colitis' |
| 10. | 'granulomatous colitis' |
| 11. | 'crohn$ enteritis' |
| 12. | 'regional enteritis' |
| 13. | 'ulcerative colitis'/exp |
| 14. | 'ulcerative colitis' |
| 15. | 'idiopathic proctocolitis' |
| 16. | 'pancolitis' |
| 17. | 'colitis gravis' |
| 18. | 'ulcerative proctosigmoiditis' |
| 19. | 5 or 6 or 7 or 8 or 9 or 10 or 11 or 12 or 13 or 14 or 15 or 16 or 17 or 18 |
| 20. | 4 and 19 |
| Cochrane Central Register of Controlled Trials | 1. | MeSH descriptor: [Pancreatitis] explode all trees |
| 2. | pancreatitis:ti,ab,kw |
| 3. | pancreatitides:ti,ab,kw |
| 4. | 1 or 2 or 3 |
| 5. | MeSH descriptor: [Inflammatory Bowel Diseases] explode all trees |
| 6. | inflammatory bowel disease:ti,ab,kw |
| 7. | MeSH descriptor: [Crohn Disease] explode all trees |
| 8. | Crohn$ disease:ti,ab,kw |
| 9. | Crohn$ colitis:ti,ab,kw |
| 10. | granulomatous colitis:ti,ab,kw |
| 11. | Crohn$ enteritis:ti,ab,kw |
| 12. | regional enteritis:ti,ab,kw |
| 13. | MeSH descriptor: [Colitis, Ulcerative] explode all trees |
| 14. | ulcerative colitis:ti,ab,kw |
| 15. | idiopathic proctocolitis:ti,ab,kw |
| 16. | pancolitis:ti,ab,kw |
| 17. | colitis gravis:ti,ab,kw |
| 18. | ulcerative proctosigmoiditis:ti,ab,kw |
| 19. | 5 or 6 or 7 or 8 or 9 or 10 or 11 or 12 or 13 or 14 or 15 or 16 or 17 or 18 |
| 20. | 4 and 19 |

**Table SM2** PRISMA checklist

| **Section/topic** | **#** | **Checklist item** | **Reported on page #** |
| --- | --- | --- | --- |
| **TITLE** | | |  |
| Title | 1 | Identify the report as a systematic review, meta-analysis, or both. | **Page 1 (Title)** |
| **ABSTRACT** | | |  |
| Structured summary | 2 | Provide a structured summary including, as applicable: background; objectives; data sources; study eligibility criteria, participants, and interventions; study appraisal and synthesis methods; results; limitations; conclusions and implications of key findings; systematic review registration number. | **Page 2 (Abstract)** |
| **INTRODUCTION** | | |  |
| Rationale | 3 | Describe the rationale for the review in the context of what is already known. | **Page 3 (Introduction)** |
| Objectives | 4 | Provide an explicit statement of questions being addressed with reference to participants, interventions, comparisons, outcomes, and study design (PICOS). | **Page 3-4 (Introduction)** |
| **METHODS** | | |  |
| Protocol and registration | 5 | Indicate if a review protocol exists, if and where it can be accessed (e.g., Web address), and, if available, provide registration information including registration number. | **Page 4(Methods)** |
| Eligibility criteria | 6 | Specify study characteristics (e.g., PICOS, length of follow-up) and report characteristics (e.g., years considered, language, publication status) used as criteria for eligibility, giving rationale. | **Page 4 (Inclusion Criteria)** |
| Information sources | 7 | Describe all information sources (e.g., databases with dates of coverage, contact with study authors to identify additional studies) in the search and date last searched. | **Page 4 (Inclusion Criteria)** |
| Search | 8 | Present full electronic search strategy for at least one database, including any limits used, such that it could be repeated. | **Page 4 (Inclusion Criteria)** |
| Study selection | 9 | State the process for selecting studies (i.e., screening, eligibility, included in systematic review, and, if applicable, included in the meta-analysis). | **Page 4 (Selection of Studies)** |
| Data collection process | 10 | Describe method of data extraction from reports (e.g., piloted forms, independently, in duplicate) and any processes for obtaining and confirming data from investigators. | **Page 5 (Data Extraction)** |
| Data items | 11 | List and define all variables for which data were sought (e.g., PICOS, funding sources) and any assumptions and simplifications made. | **Page 4-5(Selection of Studies and Data Extraction)** |
| Risk of bias in individual studies | 12 | Describe methods used for assessing risk of bias of individual studies (including specification of whether this was done at the study or outcome level), and how this information is to be used in any data synthesis. | **Page 5 (Risk of Bias Assessment)** |
| Summary measures | 13 | State the principal summary measures (e.g., risk ratio, difference in means). | **Page 5 (Statistical Analysis)** |
| Synthesis of results | 14 | Describe the methods of handling data and combining results of studies, if done, including measures of consistency (e.g., I2) for each meta-analysis. | **Page 5 (Statistical Analysis)** |

Page 1 of 2

| **Section/topic** | **#** | **Checklist item** | **Reported on page #** |
| --- | --- | --- | --- |
| Risk of bias across studies | 15 | Specify any assessment of risk of bias that may affect the cumulative evidence (e.g., publication bias, selective reporting within studies). | **Page 5 (Risk of Bias Assessment / Statistical Analysis)** |
| Additional analyses | 16 | Describe methods of additional analyses (e.g., sensitivity or subgroup analyses, meta-regression), if done, indicating which were pre-specified. | **Page 5(Statistical Analysis)** |
| **RESULTS** | | |  |
| Study selection | 17 | Give numbers of studies screened, assessed for eligibility, and included in the review, with reasons for exclusions at each stage, ideally with a flow diagram. | **Page 17 (Study Selection, Fig. 1)** |
| Study characteristics | 18 | For each study, present characteristics for which data were extracted (e.g., study size, PICOS, follow-up period) and provide the citations. | **Page 15(Table 1, Characteristics of** **Included Studies )** |
| Risk of bias within studies | 19 | Present data on risk of bias of each study and, if available, any outcome level assessment (see item 12). | **Page 18(Risk of Bias within Studies, Fig. 2)** |
| Results of individual studies | 20 | For all outcomes considered (benefits or harms), present, for each study: (a) simple summary data for each intervention group (b) effect estimates and confidence intervals, ideally with a forest plot. | **Page 6/19(Fig 3/Association Between Pancreatitis and IBD)** |
| Synthesis of results | 21 | Present results of each meta-analysis done, including confidence intervals and measures of consistency. | **Page 6 (Association Between Pancreatitis and IBD)** |
| Risk of bias across studies | 22 | Present results of any assessment of risk of bias across studies (see Item 15). | **Page 5-6(Risk of Bias of Included Studies)** |
| Additional analysis | 23 | Give results of additional analyses, if done (e.g., sensitivity or subgroup analyses, meta-regression [see Item 16]). | **Page 6 (Association Between Pancreatitis and IBD)** |
| **DISCUSSION** | | |  |
| Summary of evidence | 24 | Summarize the main findings including the strength of evidence for each main outcome; consider their relevance to key groups (e.g., healthcare providers, users, and policy makers). | **Page 6-7(Discussion)** |
| Limitations | 25 | Discuss limitations at study and outcome level (e.g., risk of bias), and at review-level (e.g., incomplete retrieval of identified research, reporting bias). | **Page 8 (Discussion)** |
| Conclusions | 26 | Provide a general interpretation of the results in the context of other evidence, and implications for future research. | **Page 8 (Discussion)** |
| **FUNDING** | | |  |
| Funding | 27 | Describe sources of funding for the systematic review and other support (e.g., supply of data); role of funders for the systematic review. | **Page 9 (Funding)** |

*From:*  Moher D, Liberati A, Tetzlaff J, Altman DG, The PRISMA Group (2009). Preferred Reporting Items for Systematic Reviews and Meta-Analyses: The PRISMA Statement. PLoS Med 6(6): e1000097. doi:10.1371/journal.pmed1000097

For more information, visit: **www.prisma-statement.org**.

Page 2 of 2

**Table SM3: MOOSE checklist**

| **Item No** | **Recommendation** | **Reported on Page No** |
| --- | --- | --- |
| Reporting of background should include | | |
| 1 | Problem definition | 3-4 |
| 2 | Hypothesis statement | 3-4 |
| 3 | Description of study outcome(s) | 3-4 |
| 4 | Type of exposure or intervention used | 3-4 |
| 5 | Type of study designs used | 3-4 |
| 6 | Study population | 3-4 |
| Reporting of search strategy should include | | |
| 7 | Qualifications of searchers (eg, librarians and investigators) | 4 |
| 8 | Search strategy, including time period included in the synthesis and key words | 4 |
| 9 | Effort to include all available studies, including contact with authors | 4 |
| 10 | Databases and registries searched | 4 |
| 11 | Search software used, name and version, including special features used (eg, explosion) | 4 |
| 12 | Use of hand searching (eg, reference lists of obtained articles) | 4 |
| 13 | List of citations located and those excluded, including justification | 4 |
| 14 | Method of addressing articles published in languages other than English | 4 |
| 15 | Method of handling abstracts and unpublished studies | 4 |
| 16 | Description of any contact with authors | 4 |
| Reporting of methods should include | | |
| 17 | Description of relevance or appropriateness of studies assembled for assessing the hypothesis to be tested | 4 |
| 18 | Rationale for the selection and coding of data (eg, sound clinical principles or convenience) | 4 |
| 19 | Documentation of how data were classified and coded (eg, multiple raters, blinding and interrater reliability) | 4-5 |
| 20 | Assessment of confounding (eg, comparability of cases and controls in studies where appropriate) | 4-5 |
| 21 | Assessment of study quality, including blinding of quality assessors, stratification or regression on possible predictors of study results | 4-5 |
| 22 | Assessment of heterogeneity | 5 |
| 23 | Description of statistical methods (eg, complete description of fixed or random effects models, justification of whether the chosen models account for predictors of study results, dose-response models, or cumulative meta-analysis) in sufficient detail to be replicated | 5 |
| 24 | Provision of appropriate tables and graphics | 17 |
| Reporting of results should include | | |
| 25 | Graphic summarizing individual study estimates and overall estimate | 16/19 |
| 26 | Table giving descriptive information for each study included | 15 |
| 27 | Results of sensitivity testing (eg, subgroup analysis) | 6 |
| 28 | Indication of statistical uncertainty of findings | None |

| **Item No** | **Recommendation** | **Reported on Page No** |
| --- | --- | --- |
| Reporting of discussion should include | | |
| 29 | Quantitative assessment of bias (eg, publication bias) | 6-7 |
| 30 | Justification for exclusion (eg, exclusion of non-English language citations) | 6-8 |
| 31 | Assessment of quality of included studies | 5,6,15,18 |
| Reporting of conclusions should include | | |
| 32 | Consideration of alternative explanations for observed results | 8 |
| 33 | Generalization of the conclusions (ie, appropriate for the data presented and within the domain of the literature review) | 8 |
| 34 | Guidelines for future research | 8 |
| 35 | Disclosure of funding source | 9 |

*From*: Stroup DF, Berlin JA, Morton SC, et al, for the Meta-analysis Of Observational Studies in Epidemiology (MOOSE) Group. Meta-analysis of Observational Studies in Epidemiology. A Proposal for Reporting. *JAMA*. 2000;283(15):2008-2012. doi: 10.1001/jama.283.15.2008.
